# Supplementary material
Source: PubMed Central journal article supplement (PMC5354196)
Supplement: supp_tpc.16.00806_TPC2016-00806-RAR1_Supplemental_Data.pdf [file supp_tpc.16.00806_TPC2016-00806-RAR1_Supplemental_Data.pdf]

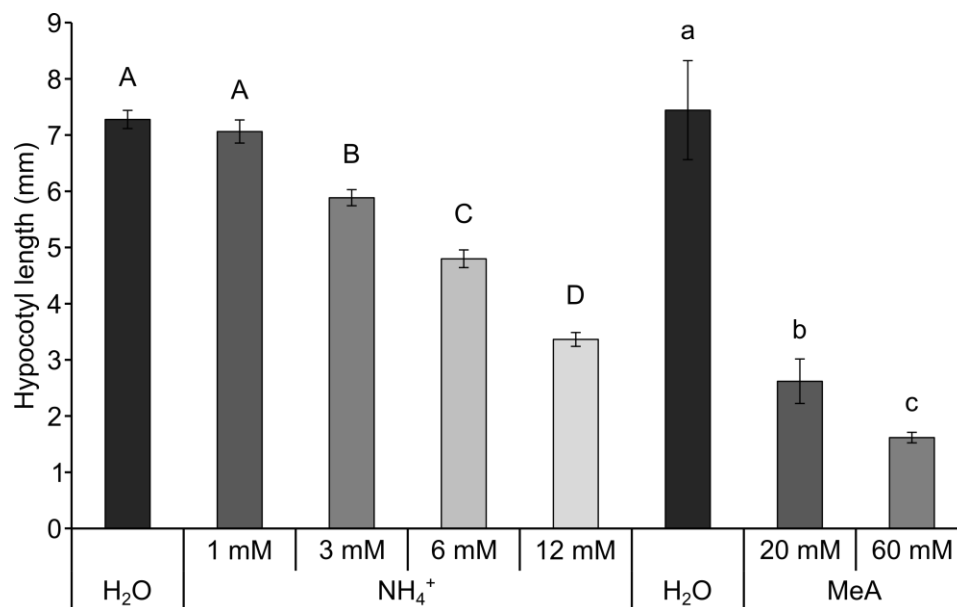

**Supplemental Figure 1.** Susceptibility of Col-0 seedlings grown in the dark to toxic concentrations of ammonium and methylammonium (MeA).

Seeds were sown on filter papers soaked with water containing ammonium or methylammonium in the indicated concentration. After breaking dormancy in 4°C for two days, seedlings were exposed to light for 6 hours and subsequently incubated in the dark for 6 days. Growth was assayed by the computer program *ImageJ*. Values are means ± SE. n ≥ 60. Upper and lower letters were used for comparison of different experiments, different letters indicate significant differences at the level of p-value ≤ 0.05.

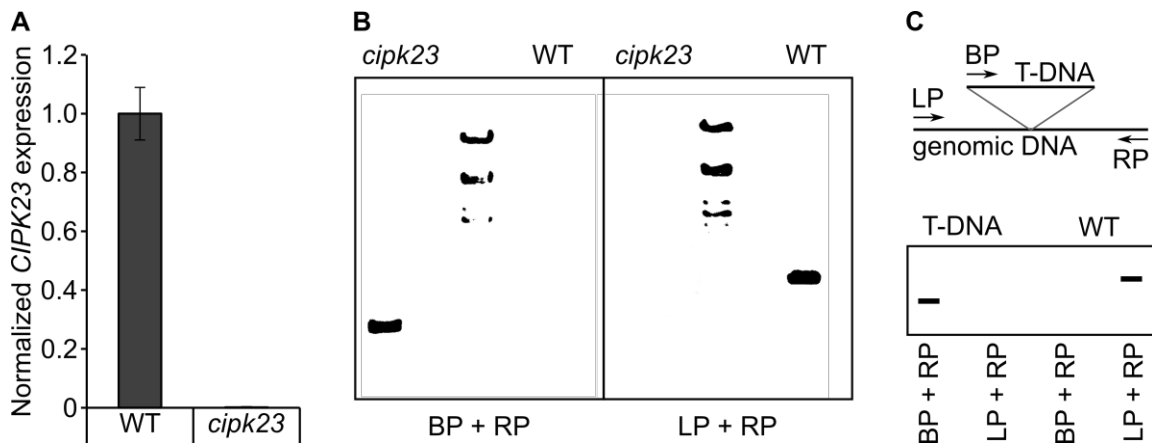

**Supplemental Figure 2.** Test for homozygosity of *cipk23* and CIPK23 expression in *cipk23*.

**(A)** *CIPK23* expression in *cipk23* plants was tested by qPCR relative to wild type (WT). The experiment was reproducible (4 times repeated) and representative data is shown  $\pm$  SD; 1g of 14 day old seedlings was pooled to gain one sample; n=4.

**(B)** Test for zygosity of *cipk23* T-DNA insertion plant line. Left: T-DNA insertion band with RP (right primer) and BP (left T-DNA border primer). Right wild type band with RP (right primer) and LP (left primer).

**(C)** Cartoon showing the binding sites for the T-DNA and gene specific primers and the expected genotyping result for a homozygous insertion line.

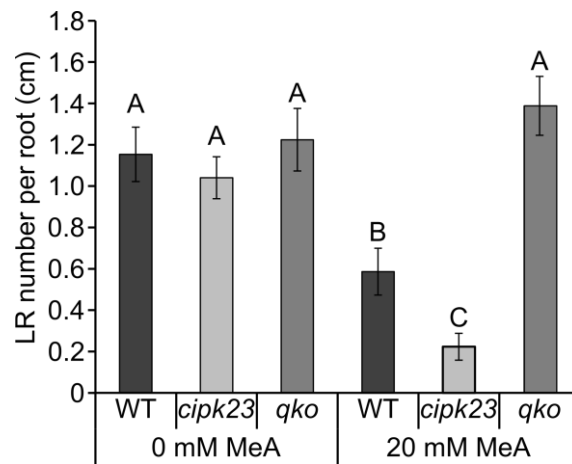

**Supplemental Figure 3.** Root phenotypes of the *cipk23* and *qko* mutants.

Number of the first order lateral roots relative to the primary root length in wild type, *cipk23* and *qko* plants grown on 20 mM MeA. Plants were precultured on HL medium containing 2 mM potassium nitrate as sole nitrogen source for 4 days and then transferred on agar plates containing 0, 20, or 30 mM MeA in the presence of 2 mM  $\text{KNO}_3$  for 14 days. Values are means  $\pm$  SD;  $n \geq 27$ . A/B/C ANOVA test  $p$ -value  $\leq 0.001$ .

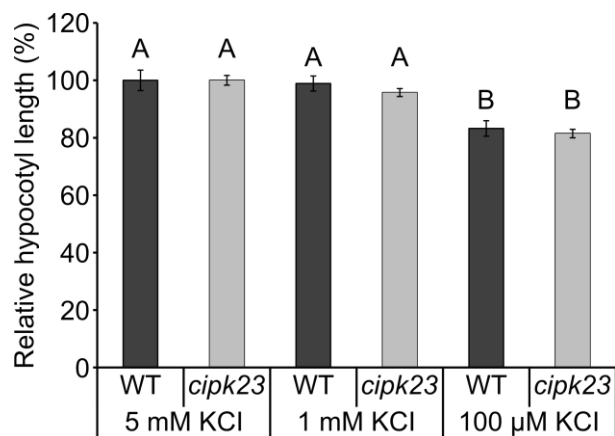

**Supplemental Figure 4.** Influence of potassium on hypocotyl elongation.

Seeds were sown on filter papers soaked with water containing potassium in the indicated concentration. After breaking dormancy in 4°C for two days, seedlings were exposed to light for 6 hours and subsequently incubated in the dark for 6 days. Growth was assayed by the computer program *ImageJ* and normalized on the 5 mM mean. Values are means  $\pm$  SE.  $n \geq 60$ . A/B t-test  $p$ -value  $\leq 0.05$ .

**A**

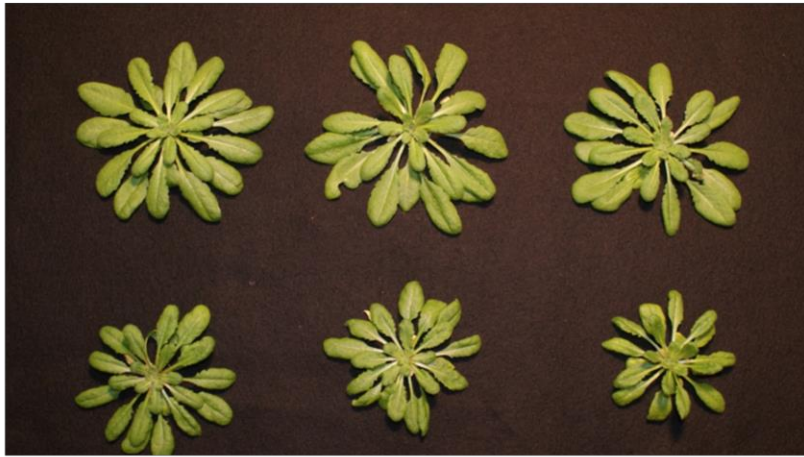

**B**

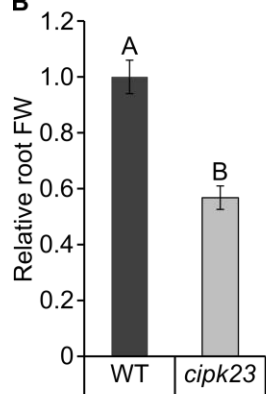

**C**

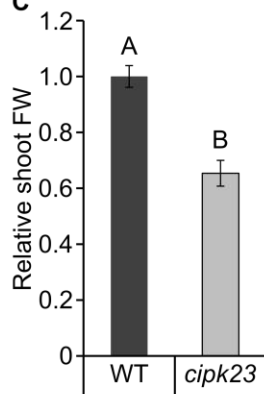

**D**

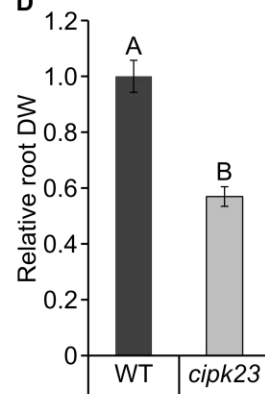

**E**

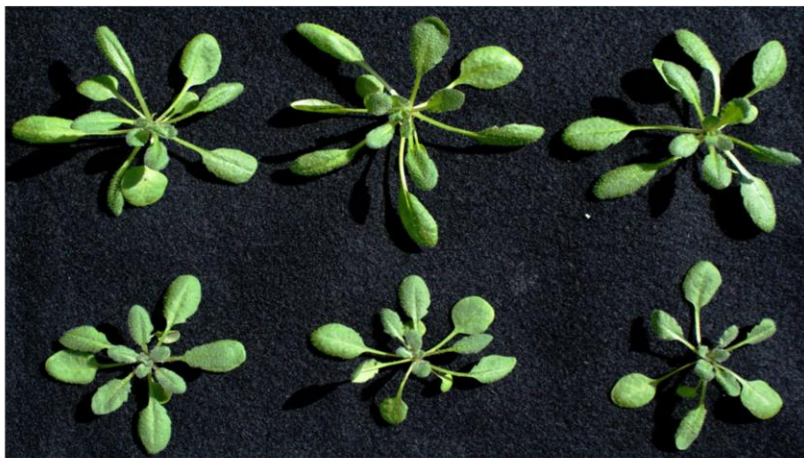

**F**

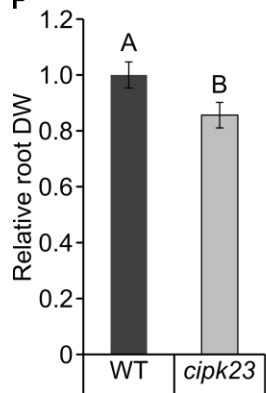

**G**

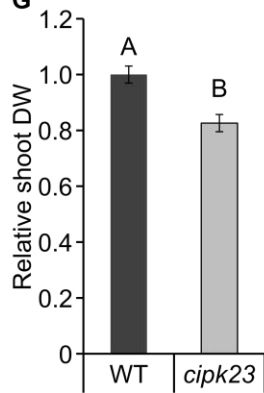

**Supplemental Figure 5.** Comparative growth under normal (1 mM) and elevated potassium conditions (5 mM potassium).

**(A)** Rosette size of wild type (top) and *cipk23* (bottom) plants cultivated for 6 weeks in HL with 1 mM KNO<sub>3</sub> and 1 mM NH<sub>4</sub>NO<sub>3</sub> hydroponically. Relative fresh weight (FW) shoot **(B)**, fresh weight root **(C)** and dry weight (DW) root **(D)**. Data shown are means  $\pm$ SD; n=24. A/B students T-test p-value  $\leq$  0.001.

**(E)** Plant (wild type and *cipk23*) growth after 4 weeks under elevated potassium nutrition (5 mM potassium) wild type (top) and *cipk23* (bottom). **(F)** Root and **(G)** shoot dry weight of 6 week old plants, data is shown as means  $\pm$ SD; n $\geq$ 60. Significance tested with T-test and indicated by A/B, p  $\leq$  0.001. WT, wild type plants.

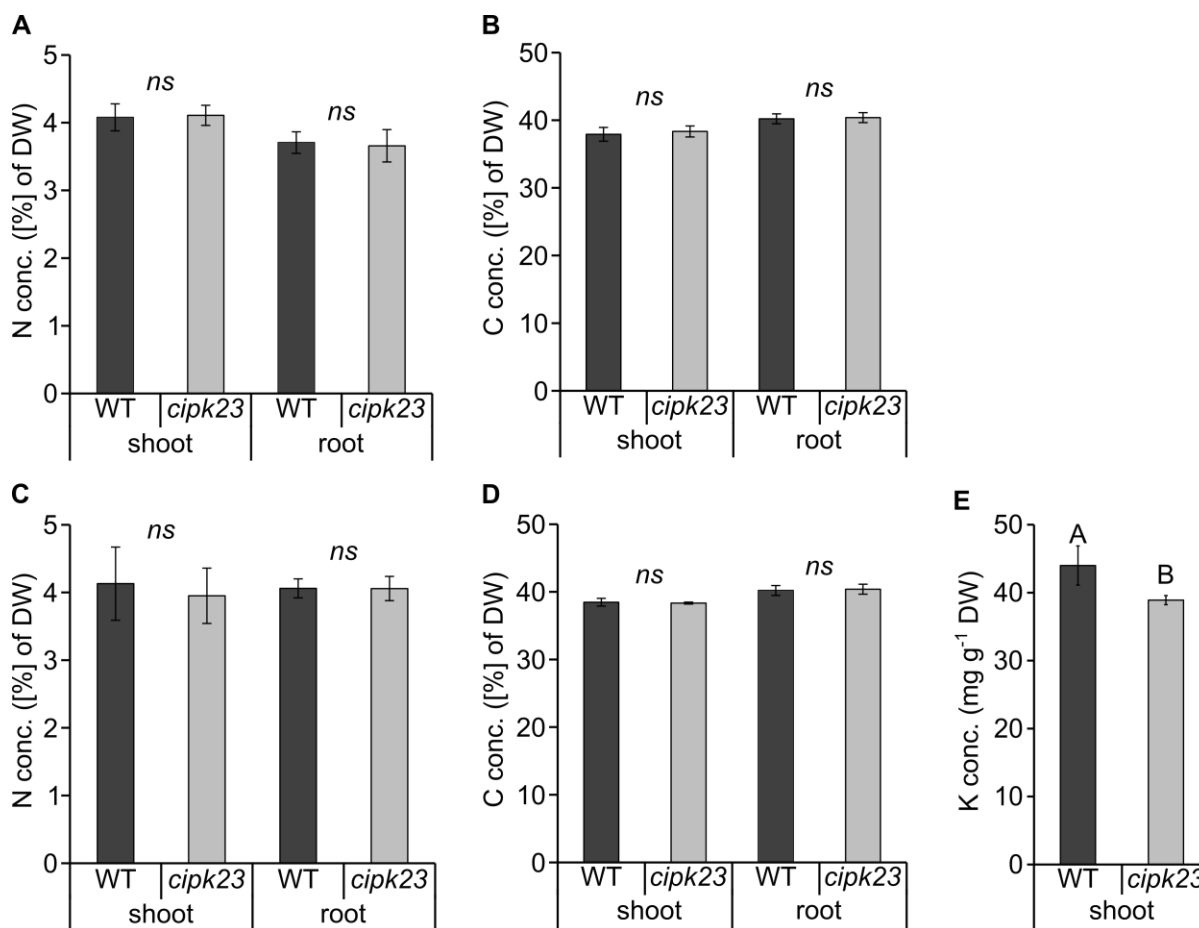

**Supplemental Figure 6.** Nutrient concentrations in 6-week-old wild type and *cipk23* plants grown under normal (1 mM) and elevated potassium conditions (5 mM potassium).

**(A)** Nitrogen (n=24) and **(B)** Carbon (n=24) concentration in the shoot and root of wild type (WT) and *cipk23* plants grown under normal potassium nutrition and elevated potassium nutrition **(C)** and **(D)** respectively (n≥60).

**(E)** Potassium concentration in the shoots of wild type and *cipk23* plants (n=15) under elevated potassium nutrition. Plants were grown hydroponically in HL solution for 6 weeks. Three independent experiments were performed, and values are means ± SD. Concentrations are given in % of dry weight (DW). A/B students T-test p-value ≤ 0.05; ns, not significant.

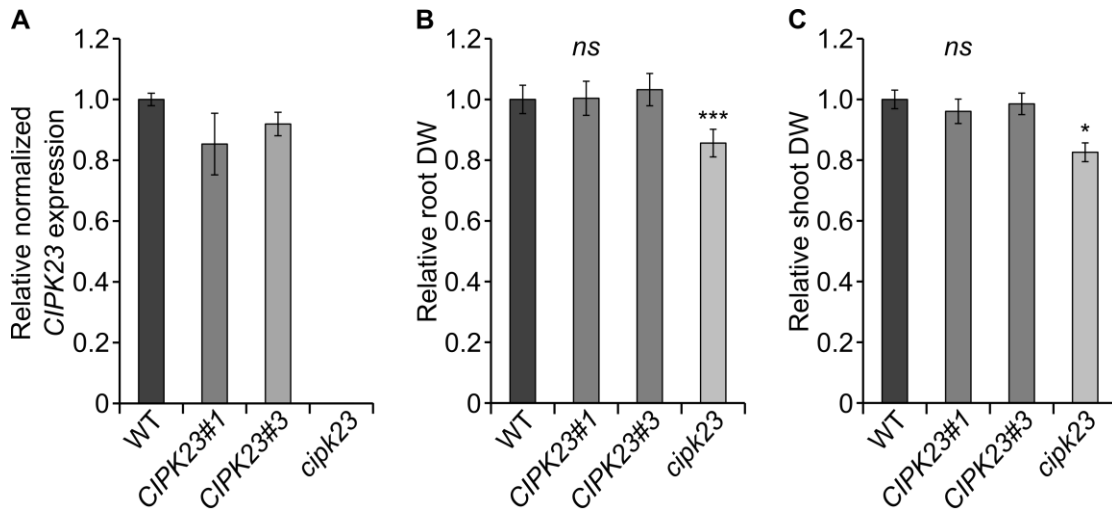

**Supplemental Figure 7.** Complementation of the *cipk23* line.

**(A)** *CIPK23* expression in wild type, *cipk23*, and two complementation lines *CIPK23<sub>pro</sub>:CIPK23-1*, *CIPK23<sub>pro</sub>:CIPK23-3*. Using quantitative PCR, *CIPK23* gene expression in complementation plant lines was tested relative to the expression in wild type. Data is shown as means  $\pm$ SD; 1g of 14 day old seedlings was pooled in one sample; n=4; experiment was repeated 3 times.

**(B)** Root and **(C)** shoot dry weight of wild type, *cipk23*, and two complementation lines *CIPK23<sub>pro</sub>:CIPK23-1* and *CIPK23<sub>pro</sub>:CIPK23-3*. Plants were grown hydroponically (5 mM potassium in HL) and harvested after 6 weeks. The experiment was repeated twice, values are means  $\pm$  SD; n $\geq$ 60. Significance was tested using student T-test and indicated by stars; \*,  $p \leq 0.05$ ; \*\*\*  $p \leq 0.001$ ; ns, not significant. WT, wild type plants. *CIPK23<sub>pro</sub>:CIPK23-1*, *CIPK23#1*; *CIPK23<sub>pro</sub>:CIPK23-3*, *CIPK23#3*.



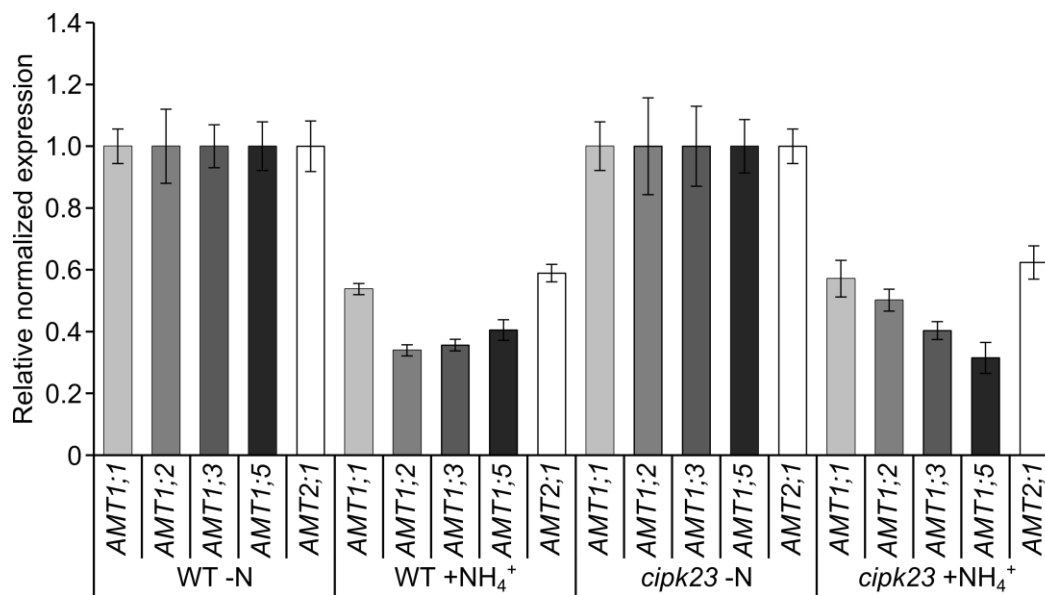

**Supplemental Figure 8.** Relative normalized expression of ammonium transporter genes in wild type and *cipk23* plants after nitrogen starvation and after subsequent ammonium shock.

Plants were grown hydroponically in HL solution for 6 weeks and then transferred in HL solution without nitrogen. After 4 days of nitrogen starvation (WT-N; *cipk23*-N) some of the plants were subjected to HL with 1mM (NH<sub>4</sub>)<sub>2</sub>SO<sub>4</sub> for 30 min – ammonium shock (WT+NH<sub>4</sub><sup>+</sup>; *cipk23*+ NH<sub>4</sub><sup>+</sup>). The experiment was repeated 3 times values are means ±SD; n=3; always 10 plants were pooled in one sample. WT, wild type plants; *cipk23*, *cipk23* plants.

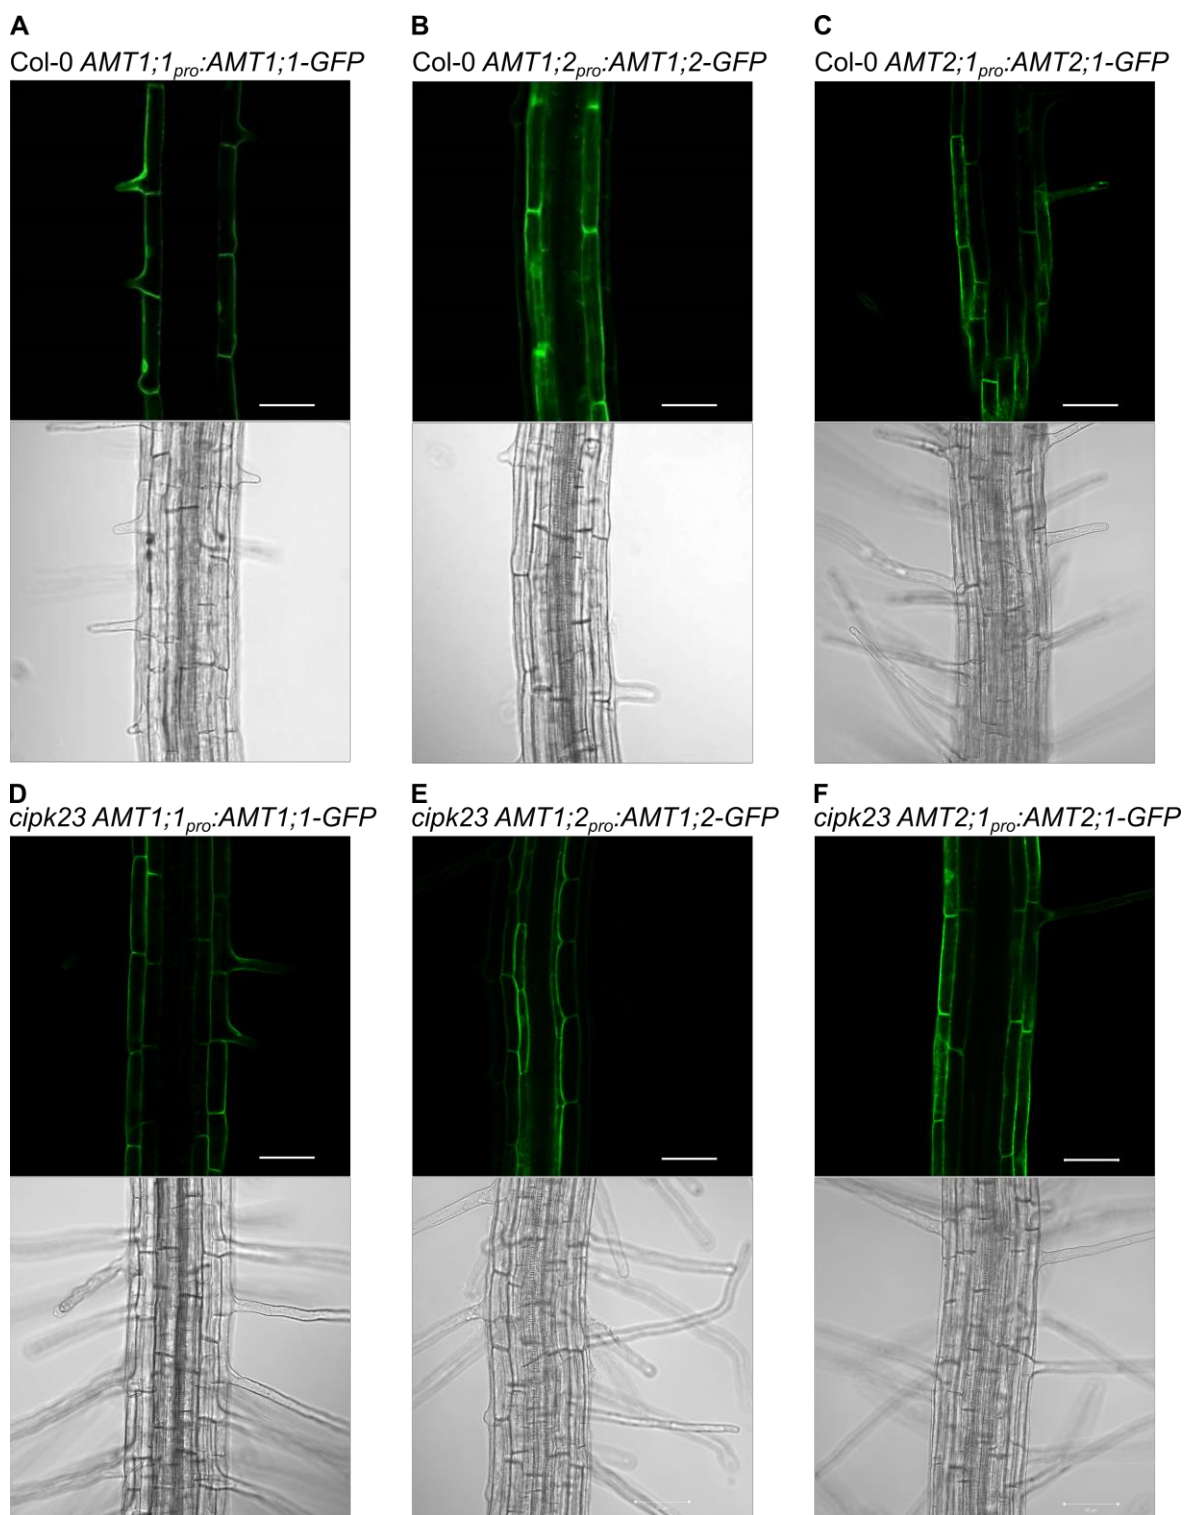

**Supplemental Figure 9.** AMT localization in the *Arabidopsis thaliana* Col-0 (upper panel) and *cipk23* (lower panel) backgrounds.

AMTs are expressed under their endogenous promoter and fused to the green fluorescent protein. AMT1;1 (**left; A/D**) and AMT2;1 (**right; C/F**) are expressed in root cortex and epidermis, while AMT1;2 (**middle; B/E**) is found in the endodermal and cortical cells regardless of the background. Scale bar size = 50 $\mu$ M.

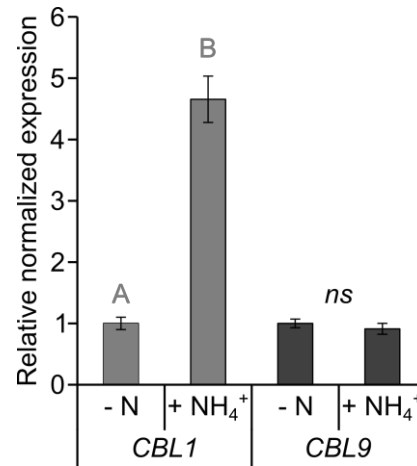

**Supplemental Figure 10.** Relative normalized expression of *CBL1* and *CBL9* in 6-week-old *cipk23* plants after 4 days of nitrogen starvation (-N) and after 30 min of 2 mM NH<sub>4</sub><sup>+</sup> (as 1 mM (NH<sub>4</sub>)<sub>2</sub>SO<sub>4</sub>) shock.

Significance was tested using students T-test,  $p \leq 0.001$ . Data is shown as means  $\pm$ SD. Always 5 plants were pooled in sample, three biological replicates (each from a separate experiment) were used and for each replicate two technical replications were performed.

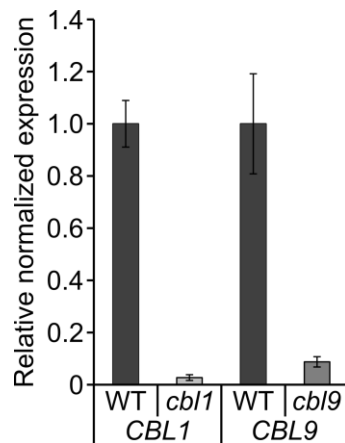

**Supplemental Figure 11.** *CBL1* and *CBL9* expression in *cb1* and *cb9* T-DNA insertion lines.

Using quantitative RT-PCR, two different T-DNA insertion lines (*cb1* and *cb9*) were tested for their expression of the respective gene relative to wild type (WT). The experiment was reproduced 3 times and data is shown as means  $\pm$  SD. 1g of 14 day old seedlings was pooled in one sample, two biological replicates were used and for each replicate two technical replications were performed.

**Supplemental Table 1.** T-DNA insertion lines used in the hypocotyl screen.

NASC: Line number given by the *European Arabidopsis Stock Centre*, T-DNA Line: Line number given by the producing institute, AGI-Code and Gene Name of the kinases used are given.

| NASC    | T-DNA Line          | AGI-Code  | Gene Name                          |
|---------|---------------------|-----------|------------------------------------|
| N669412 | Salk_014699C        | At1g01140 | AtSnRK3.12/AtPKS6/AtCIPK9          |
| N663934 | Salk_127158C        | At1g08720 | AtEDR1                             |
| N901418 | WiscDsLoxHs015_10B  | At1g11280 |                                    |
| N659985 | Salk_076543C        |           |                                    |
| N655245 | Salk_007756C        | At1g18040 |                                    |
| N662100 | Salk_036154C        | At1g30270 | AtSnRK3.23/AtPKS17/AtCIPK23        |
| N667044 | Salk_112091C        |           |                                    |
| N661978 | Salk_029403C        | At1g48260 | AtSnRK3.21/AtPKS20/AtCIPK17        |
| N665133 | Salk_003412C        |           |                                    |
| N677316 | Salk_146186C        | At1g50030 | AtTOR                              |
| N669165 | Salk_142042C        | At1g51660 | AtMKK4/AtMAPKK4                    |
| N671393 | Salk_018804C        |           |                                    |
| N872509 | SAIL_251_B02        | At1g54960 | AtANP2                             |
| N661330 | Salk_004748C        | At1g67520 |                                    |
| N858701 | WiscDsLox497_10B    |           |                                    |
| N657698 | Salk_081193C        | At1g72180 |                                    |
| N661575 | Salk_014533C        |           |                                    |
| N661655 | Salk_017378C        | At1g73500 | AtMKK9/AtMAPKK9                    |
| N657637 | Salk_059205C        | At1g73660 |                                    |
| N669306 | Salk_001982C        |           |                                    |
| N668518 | Salk_077975C        | At1g79670 | AtWAKL22                           |
| N829571 | SAIL_675_F09        |           |                                    |
| N654919 | Salk_137779C        | At2g26980 | AtSnRK3.17/AtPKS12/AtCIPK3         |
| N672732 | Salk_074944C        |           |                                    |
| N669693 | Salk_051317C        | At2g28990 |                                    |
| N667130 | Salk_118231C        | At2g30360 | AtSnRK3.22/AtPKS5/AtCIPK11         |
| N656985 | Salk_131251C        | At2g41890 |                                    |
| N659911 | Salk_058928C        |           |                                    |
| N657979 | Salk_081990C        | At3g06030 | AtANP3                             |
| N668209 | Salk_047797C        | At3g21220 | AtMKK5/AtMAPKK5                    |
| N911333 | WiscDsLoxHs119_01E  | At3g23000 | AtSnRK3.10/AtPKS7/AtCIPK7/AtSR2    |
| N660127 | Salk_116983C        | At4g00340 |                                    |
| N664674 | Salk_069473C        | At4g08500 | AtMEKK1                            |
| N658593 | Salk_029496C        | At4g14780 |                                    |
| N658925 | Salk_135277C        |           |                                    |
| N852223 | WiscDsLox345-348N24 | At4g18700 | AtSnRK3.9/AtPKS8/AtCIPK12          |
| N664463 | Salk_018985C        | At4g24400 | AtSnRK3.13/AtPKS11/AtCIPK8         |
| N656005 | Salk_140054C        | At4g26070 | AtMKK1/AtMEK1/AtMAPKK1             |
| N852195 | WiscDsLox345-348H12 | At4g30960 | AtSnRK3.14/AtPKS4/AtCIPK6          |
| N663562 | Salk_105027C        | At4g32300 |                                    |
| N661249 | Salk_000367C        | At5g01820 | AtSnRK3.15/AtPKS24/AtCIPK14/AtSR1  |
| N672594 | Salk_066741C        | At5g03730 | AtCTR1                             |
| N913020 | WiscDsLoxHs136_08D  | At5g07070 | AtSnRK3.2/AtPKS16/AtCIPK2          |
| N664585 | Salk_046150C        | At5g11850 |                                    |
| N673571 | Salk_000085C        | At5g21326 | putative SnRK3-type protein kinase |
| N655063 | Salk_047425C        | At5g50000 |                                    |
| N664697 | Salk_076181C        |           |                                    |
| N660005 | Salk_084332C        | At5g56580 | AtMKK6/AtMAPKK6                    |
| N667034 | Salk_111320C        | At5g58380 | AtSnRK3.8/AtPKS2/AtCIPK10          |
| N318666 | GK-149A04.02        |           |                                    |
| N655352 | Salk_022711C        | At5g59650 |                                    |
| N848612 | SAIL_1297_H07       |           |                                    |

**Supplemental Table 2.** Combined  $^{15}\text{N}$  ammonium uptake rates from Figure 2.

Uptake values are given after starvation and after shock for the respective  $^{15}\text{N}$  concentration, uptake duration and genotype. Uptake is given as the complete quantity of  $^{15}\text{N}$  taken up during the short term uptake experiment by the plants per g DW. Values are means  $\pm$  SD. Reduction gives the reduction of the uptake due to the ammonium shock in % of the uptake before the shock.

| $^{15}\text{N}$ concentration | Uptake duration | Genotype        | $\text{NH}_4^+$ uptake $\mu\text{M g}^{-1}$ DW |                  | Reduction (%) |
|-------------------------------|-----------------|-----------------|------------------------------------------------|------------------|---------------|
|                               |                 |                 | 4d starvation                                  | 30 min shock     |               |
| 0.5 mM $^{15}\text{N}$        | 6 min           | WT              | 21.8 $\pm$ 0.67                                | 13.2 $\pm$ 1.52  | 31            |
|                               |                 | <i>CIPK23#1</i> | 21.3 $\pm$ 3.02                                | 11.7 $\pm$ 1.93  | 44            |
|                               |                 | <i>CIPK23#3</i> | 18.5 $\pm$ 3.13                                | 10.0 $\pm$ 2.89  | 41            |
|                               |                 | <i>cipk23</i>   | 24.1 $\pm$ 2.77                                | 15.0 $\pm$ 2.86  | 35            |
|                               | 30 min          | WT              | 54.2 $\pm$ 7.63                                | 33.1 $\pm$ 0.80  | 27            |
|                               |                 | <i>CIPK23#1</i> | 48.0 $\pm$ 5.13                                | 36.9 $\pm$ 16.70 | 27            |
|                               |                 | <i>CIPK23#3</i> | 56.8 $\pm$ 5.96                                | 32.3 $\pm$ 11.57 | 27            |
|                               |                 | <i>cipk23</i>   | 65.5 $\pm$ 5.55                                | 53.9 $\pm$ 4.73  | 13            |
| 5 mM $^{15}\text{N}$          | 6 min           | WT              | 32.0 $\pm$ 0.73                                | 22.5 $\pm$ 3.9   | 17            |
|                               |                 | <i>CIPK23#1</i> | 32.0 $\pm$ 6.3                                 | 18.6 $\pm$ 4.70  | 40            |
|                               |                 | <i>CIPK23#3</i> | 31.3 $\pm$ 4.46                                | 17.3 $\pm$ 5.69  | 39            |
|                               |                 | <i>cipk23</i>   | 31.8 $\pm$ 2.07                                | 28.7 $\pm$ 3.36  | 11            |
|                               | 30 min          | WT              | 68.2 $\pm$ 4.76                                | 53.4 $\pm$ 10.84 | 20            |
|                               |                 | <i>CIPK23#1</i> | 75.6 $\pm$ 5.23                                | 57.9 $\pm$ 2.78  | 24            |
|                               |                 | <i>CIPK23#3</i> | 74.8 $\pm$ 5.05                                | 45.7 $\pm$ 10.10 | 39            |
|                               |                 | <i>cipk23</i>   | 73.1 $\pm$ 16.81                               | 72.9 $\pm$ 12.33 | 0.07          |

**Supplemental Table 3.** Modified Hoagland medium used for plant growth. pH adjusted to 6.0.

| Salt                      | Concentration, $\mu\text{M}$ |
|---------------------------|------------------------------|
| $\text{KH}_2\text{PO}_4$  | 1000                         |
| $\text{MgSO}_4$           | 500                          |
| $\text{CaCl}_2$           | 1000                         |
| $\text{MnCl}_2$           | 9                            |
| $\text{ZnSO}_4$           | 0.765                        |
| $\text{CuSO}_4$           | 0.32                         |
| $\text{H}_3\text{BO}_3$   | 46                           |
| $\text{Na}_2\text{MoO}_4$ | 0.016                        |
| FeNaEDTA                  | 50                           |

**Supplemental Table 4.** Primers used in qRT PCR.

| Gene    | Locus     | Forward Primer (5'→3') | Reverse Primer (5'→3')   |
|---------|-----------|------------------------|--------------------------|
| AMT 1;1 | AT4G13510 | CGCGGCGCTGACAACCCTAT   | GAGGACTAGGGCCGCCACGA     |
| AMT 1;2 | AT1G64780 | GGCCGGTCCGTGGCTTTACG   | GACCGCGGTGCGACCTACAG     |
| AMT 1;3 | AT3G24300 | CGGCCACTCTGCCTCGCTAG   | CCGCACACAATCGCTGCCCA     |
| AMT 1;5 | AT3G24290 | TTCAACCCTGGTTCCTTCAC   | ACGTTTTCCGAAGAGTGTGG     |
| AMT 2;1 | AT2G38290 | GGTGCTCCTTACGCGGCCAA   | CGGGAGTGACGCCGGCTAAG     |
| CIPK23  | AT1G30270 | CGTTTTGGAATTCGTCACTG   | TGTTGAAATACTTCCTCGC      |
| CBL1    | AT4G17615 | CATTGAACGACAAGAGGTCA   | CTTGATTCACGTCTGCATCT     |
| CBL9    | AT5G47100 | ATTGAGCGCCAAGAGGTGAA   | CCATCCCGATCCACATCTGC     |
| PDF     | AT1G13320 | TAACGTGGCCAAAATGATGC   | GTTCTCCACAACCGCTTGGT     |
| SAND    | AT2G28390 | CAGACAAGGCGATGGCGATA   | GCTTTCTCTCAAGGGTTTCTGGGT |



**Supplemental Table 5.** Newly generated plant lines in this study. The combination of plasmids used for the transformation and the corresponding resistance are shown.

| Plant line                      | Plasmids used for plant transformation                                 | Resistance       |
|---------------------------------|------------------------------------------------------------------------|------------------|
| <i>cipk23</i> -AMT1;1:GFP       | <i>pTbar pAtAMT1;1:AMT1;1-GFP</i>                                      | MSX              |
| <i>cipk23</i> -AMT1;2:GFP       | <i>pTbar pAtAMT1;2:AMT1;2-GFP</i>                                      | MSX              |
| <i>cipk23</i> -AMT2;1:GFP       | <i>pTbar pAtAMT2;1:AMT2;1-GFP</i>                                      | MSX              |
| AMT1;1:NY/ <b>AMT1;1:CY</b>     | <i>pTkan+pAtAMT1;1:AMT1;1-NY/<br/><b>pTbar pAtAMT1;1:AMT1;1-CY</b></i> | Kanamycin<br>MSX |
| AMT1;2:NY/ <b>AMT1;2:CY</b>     | <i>pTkan+pAtAMT1;2:AMT1;2-NY/<br/><b>pTbar pAtAMT1;2:AMT1;2-CY</b></i> | Kanamycin<br>MSX |
| AMT1;1:NY/ <b>CIPK23:CY</b>     | <i>pTkan+pAtAMT1;1:AMT1;1-NY/<br/><b>pTbar pAtCipk23:Cipk23-CY</b></i> | Kanamycin<br>MSX |
| CIPK23:NY/ <b>AMT1;1:CY</b>     | <i>pTkan+pAtCIPK23:CIPK23-NY/<br/><b>pTbar pAtAMT1;1:AMT1;1-CY</b></i> | Kanamycin<br>MSX |
| AMT1;2:NY/ <b>CIPK23:CY</b>     | <i>pTkan+pAtAMT1;2:AMT1;2-NY/<br/><b>pTbar pAtCIPK23:CIPK23-CY</b></i> | Kanamycin<br>MSX |
| Cipk23:NY/ <b>AMT1;2:CY</b>     | <i>pTkan+pAtCipk23:Cipk23-NY/<br/><b>pTbar pAtAMT1;2:AMT1;2-CY</b></i> | Kanamycin<br>MSX |
| AMT2;1:NY/ <b>CIPK23:CY</b>     | <i>pTkan+pAtAMT2;1:AMT2;1-NY/<br/><b>pTbar pAtCIPK23:CIPK23-CY</b></i> | Kanamycin<br>MSX |
| AMT1;1:NY/ <b>PromCIPK23:CY</b> | <i>pTkan+pAtAMT1;1:AMT1;1-NY/<br/><b>pTbar pAtCipk23-CY</b></i>        | Kanamycin<br>MSX |
| AMT1;2:NY/ <b>PromCIPK23:CY</b> | <i>pTkan+pAtAMT1;2:AMT1;2-NY/<br/><b>pTbar pAtCipk23-CY</b></i>        | Kanamycin<br>MSX |
| AMT2;1:NY/ <b>PromCIPK23:CY</b> | <i>pTkan+pAtAMT2;1:AMT2;1-NY/<br/><b>pTbar pAtCipk23-CY</b></i>        | Kanamycin<br>MSX |
| <i>cipk2- amiRNA 8-2-1</i>      | <i>pUTbar amiRNA</i>                                                   | MSX              |
| <i>k1-K1(1)</i>                 | <i>pTbar pAtCIPK23:CIPK23</i>                                          | MSX              |
| <i>k1-K1(3)</i>                 | <i>pTbar pAtCIPK23:CIPK23</i>                                          | MSX              |
